# Supplementary material for: Multi-stimuli-responsive luminescence enabled by crown ether anchored chiral antimony halide phosphors
Source: Royal Society of Chemistry journal article supplement (doi:10.1039/d3sc06362c), 2024-01-01
Supplement: d3sc06362c1.pdf [file d3sc06362c1.pdf]

## Electronic Supplementary Information (ESI)

### **Multi-stimuli-responsive luminescence enabled by crown ether anchored chiral antimony halide phosphors**

*Xiao Han,<sup>a</sup> Puxin Cheng,<sup>a</sup> Shanshan Han,<sup>a</sup> Junjie Guan,<sup>a</sup> Zhihua Wang,<sup>a</sup> Wenqing Han,<sup>a</sup> Rongchao Shi,<sup>a</sup> Songhua Chen,<sup>b</sup> Yongshen Zheng,<sup>\*a</sup> Jialiang Xu<sup>\*a</sup> and Xian-He Bu<sup>a</sup>*

<sup>a</sup> School of Materials Science and Engineering, Smart Sensing Interdisciplinary Science Center, Frontiers Science Center for New Organic Matter, Nankai University, Tongyan Road 38, Tianjin 300350, P. R. China

E-mails: [yszhen@nankai.edu.cn](mailto:yszhen@nankai.edu.cn); [jialiang.xu@nankai.edu.cn](mailto:jialiang.xu@nankai.edu.cn).

<sup>b</sup> College of Chemistry and Material Science, Longyan University, Longyan 364012, Fujian, P.R. China.

## Supplementary Figures

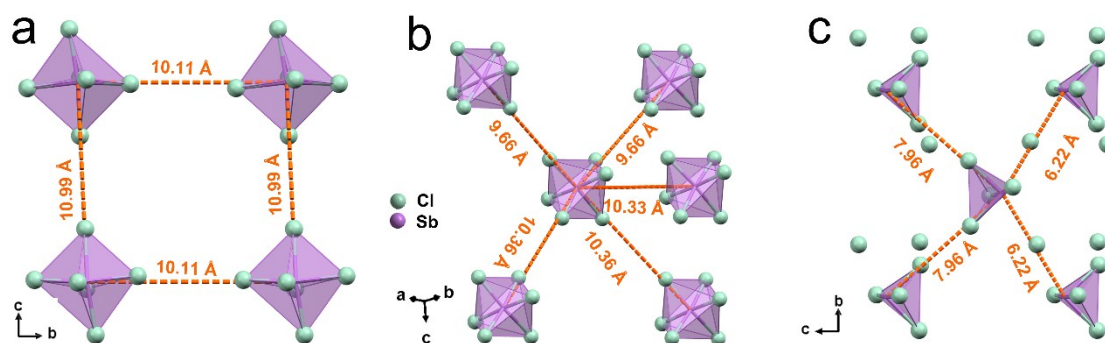

Fig. S1 The closest neighboring Sb...Sb distances (orange dotted lines) in the (a) *R*-Sb, (b) *rac*-Sb, and (c) *S*-PPD-Sb crystals.

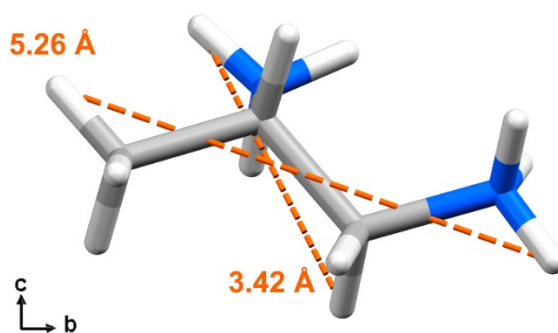

Fig. S2 The size of [S-PPD]<sup>2+</sup> cation in the *S*-PPD-Sb crystal.

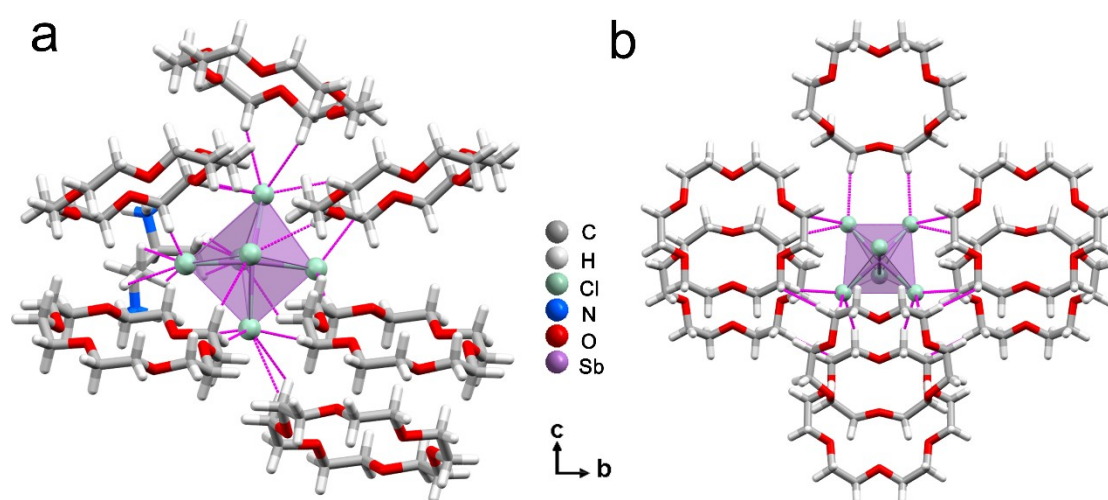

Fig. S3 Sb-Cl...H-C hydrogen bonding interactions (magenta dotted lines) viewed along a-axis in (a) *R*-Sb and (b) *rac*-Sb.

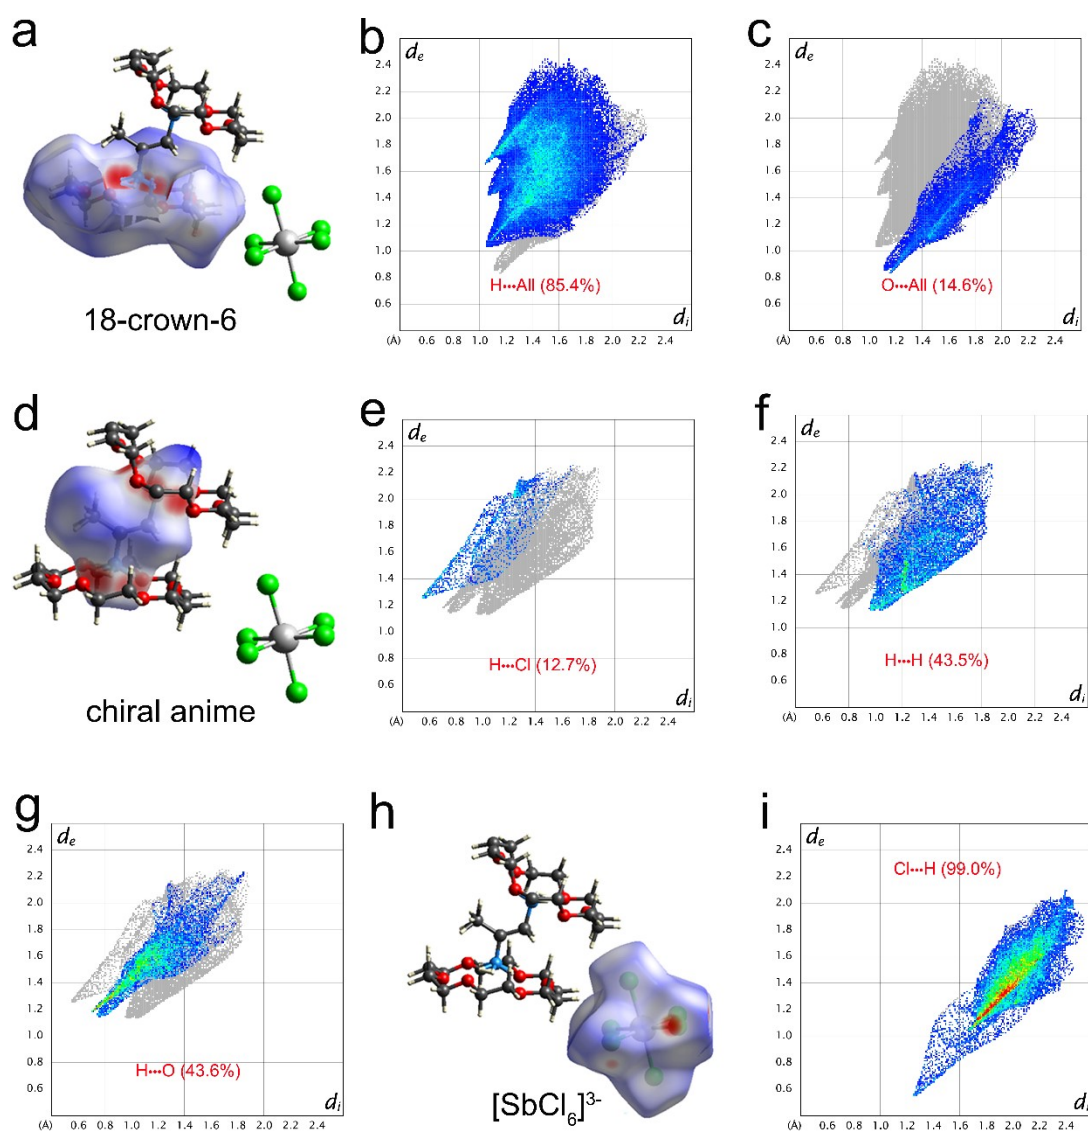

Fig. S4 Hirshfeld  $d_{\text{norm}}$  surfaces of (a) 18-crown-6, and the corresponding 2D fingerprint plots for (b) H...All and (c) O...All in **R-Sb**; Hirshfeld  $d_{\text{norm}}$  surfaces of (d) chiral 1,2-propanediamine cation, and the corresponding 2D fingerprint plots for (e) H...Cl, (f) H...H and (g) H...O in **R-Sb**; and (h) Hirshfeld  $d_{\text{norm}}$  surfaces of  $[\text{SbCl}_6]^{3-}$  octahedron in **R-Sb**, and the corresponding 2D fingerprint plots for (i) Cl...H.

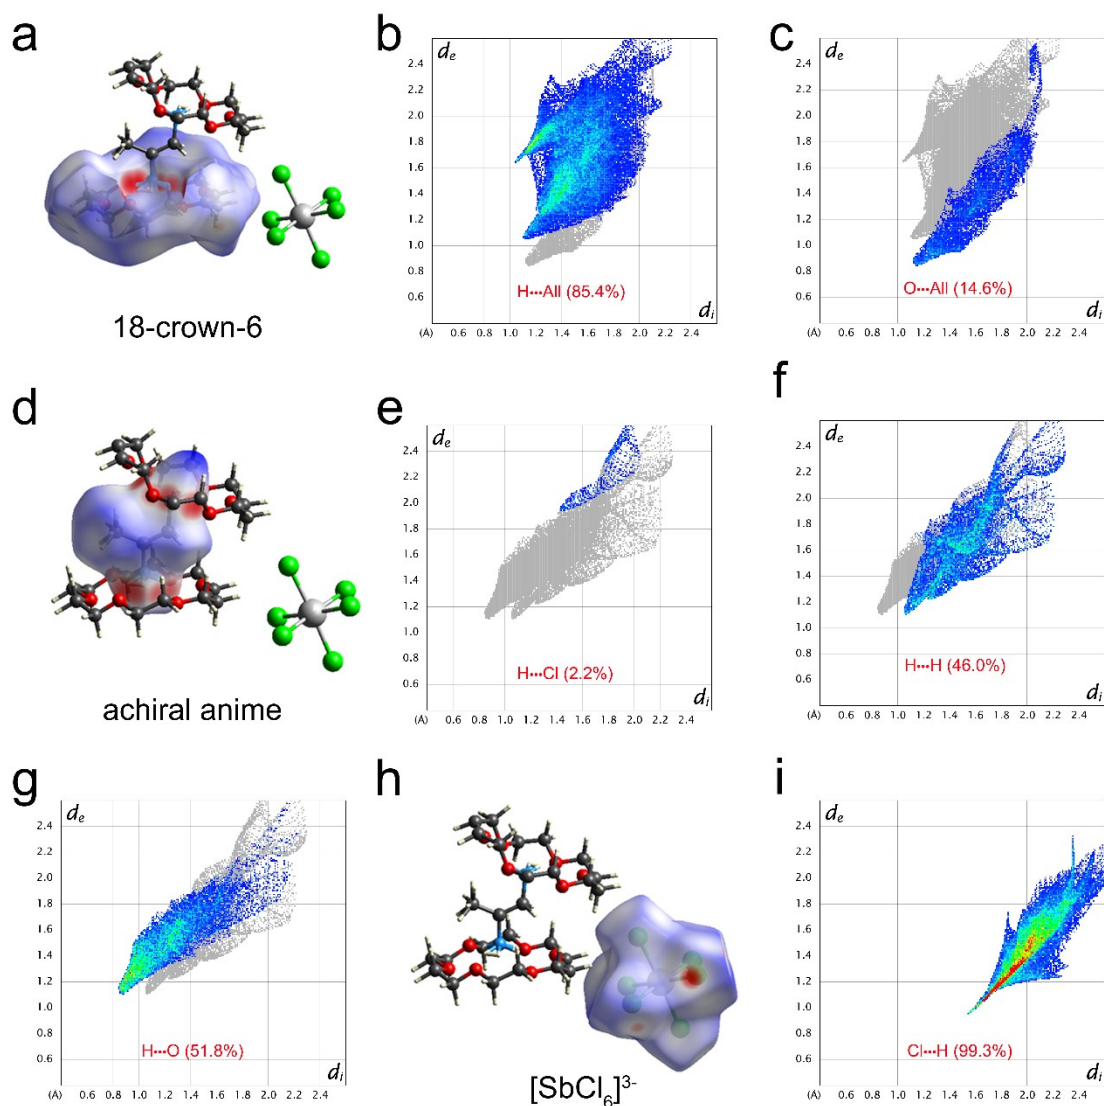

Fig. S5 Hirshfeld  $d_{\text{norm}}$  surfaces of (a) 18-crown-6, and the corresponding 2D fingerprint plots for (b) H...All and (c) O...All in *rac*-Sb; Hirshfeld  $d_{\text{norm}}$  surfaces of (d) achiral 1,2-propanediamine cation, and the corresponding 2D fingerprint plots for (e) H...Cl, (f) H...H and (g) H...O in *rac*-Sb; and (h) Hirshfeld  $d_{\text{norm}}$  surfaces of  $[\text{SbCl}_6]^{3-}$  octahedron in *rac*-Sb, and the corresponding 2D fingerprint plots for (i) Cl...H.

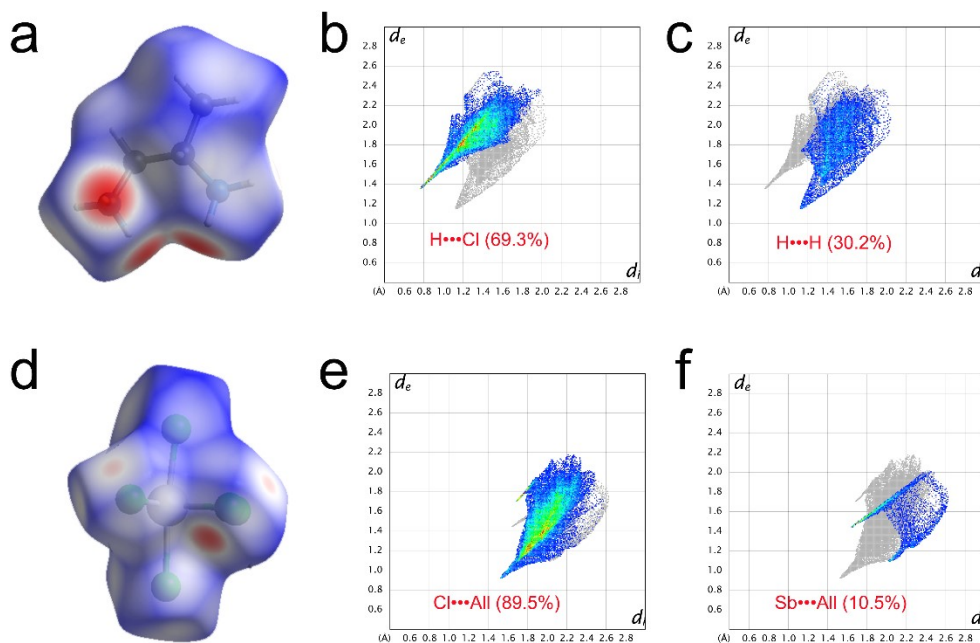

Fig. S6 Hirshfeld  $d_{\text{norm}}$  surfaces of (a) chiral  $[S\text{-PPD}]^{2+}$  cation, and the corresponding 2D fingerprint plots for (b)  $\text{H}\cdots\text{Cl}$  and (c)  $\text{H}\cdots\text{H}$  in  $S\text{-PPD-Sb}$ ; Hirshfeld  $d_{\text{norm}}$  surfaces of (d)  $[\text{SbCl}_4\text{Cl}]^{2-}$  polyhedrons, and the corresponding 2D fingerprint plots for (e)  $\text{Cl}\cdots\text{All}$ , (f)  $\text{Sb}\cdots\text{All}$ .

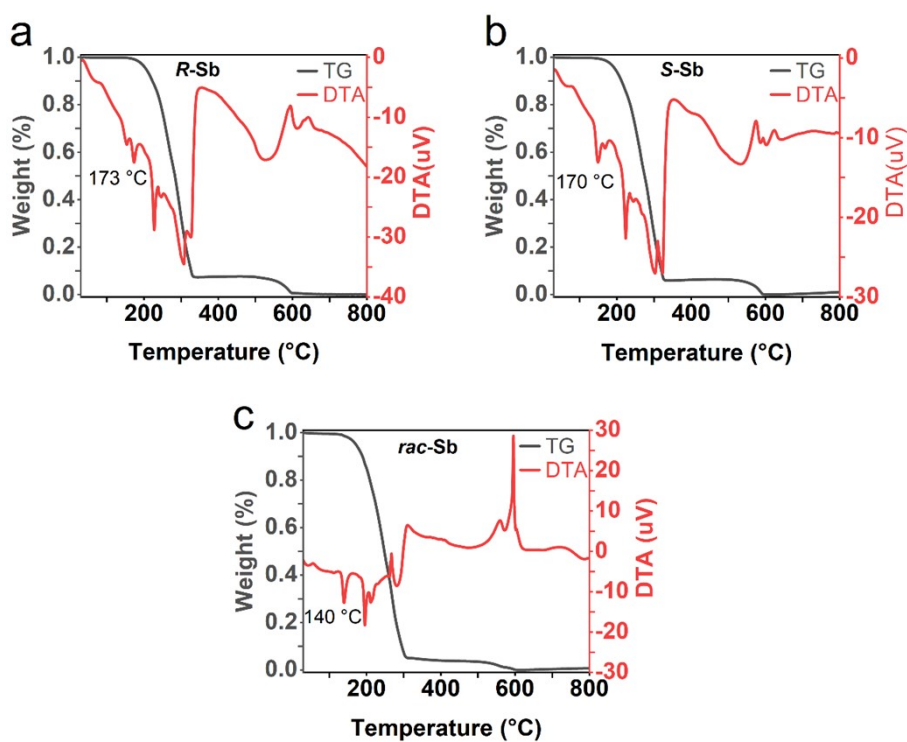

Fig. S7 TG-DTA analysis of (a)  $R\text{-Sb}$ , (b)  $S\text{-Sb}$  and (c)  $\text{rac-Sb}$ .



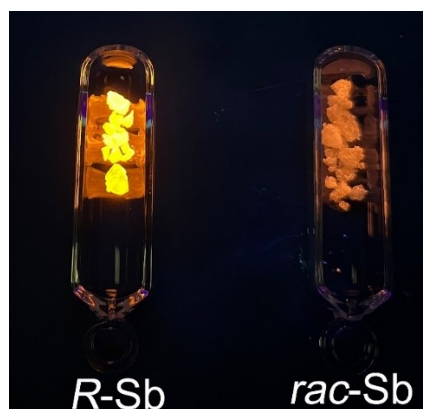

Fig. S8 PL images of ***R-Sb*** and ***rac-Sb*** under the radiation of 365 nm UV.

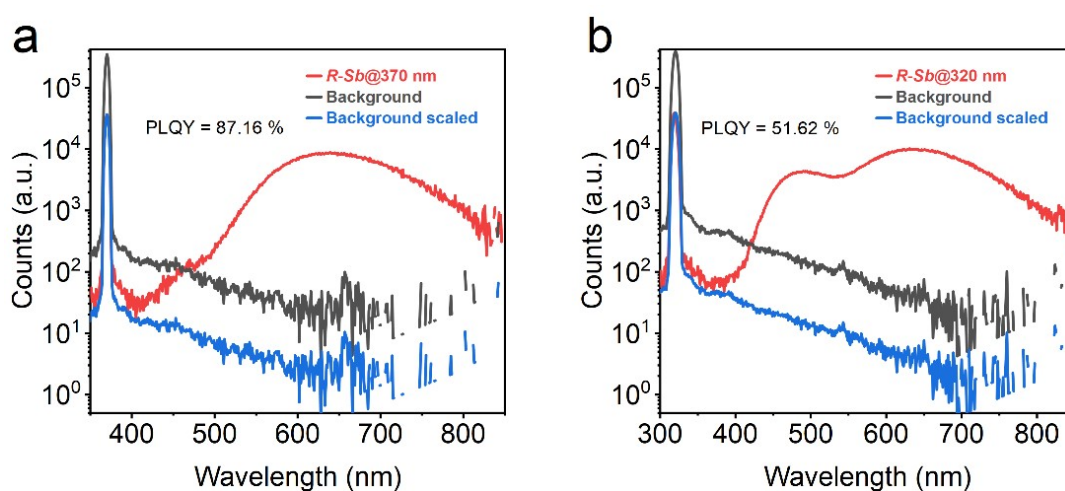

Fig. S9 Photoluminescence quantum yield of ***R-Sb*** at excitation of (a) 370 nm and (b) 320 nm.

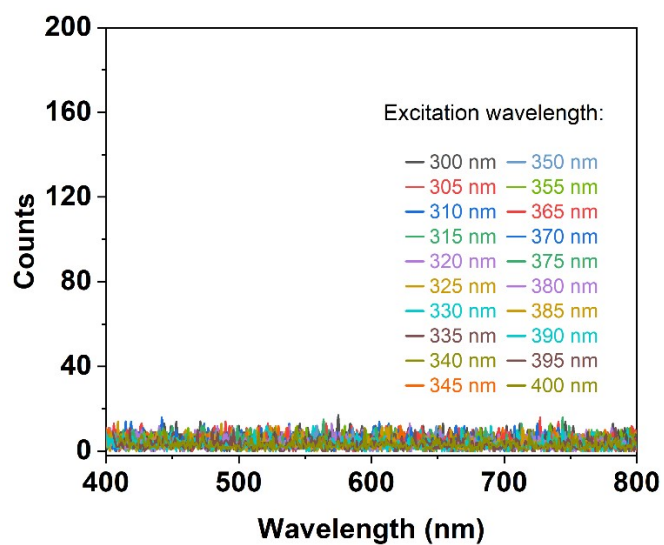

Fig. S10 Excitation-emission mapping patterns of ***S-PPD-Sb***.

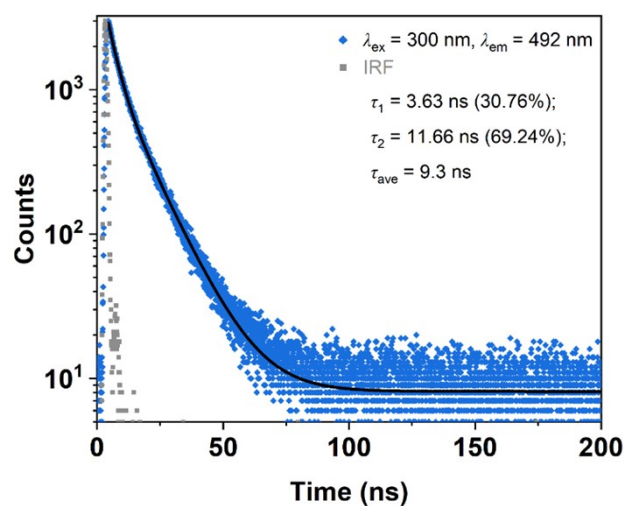

Fig. S11 Time-resolved PL decay spectrum of *R*-Sb at 492 nm.

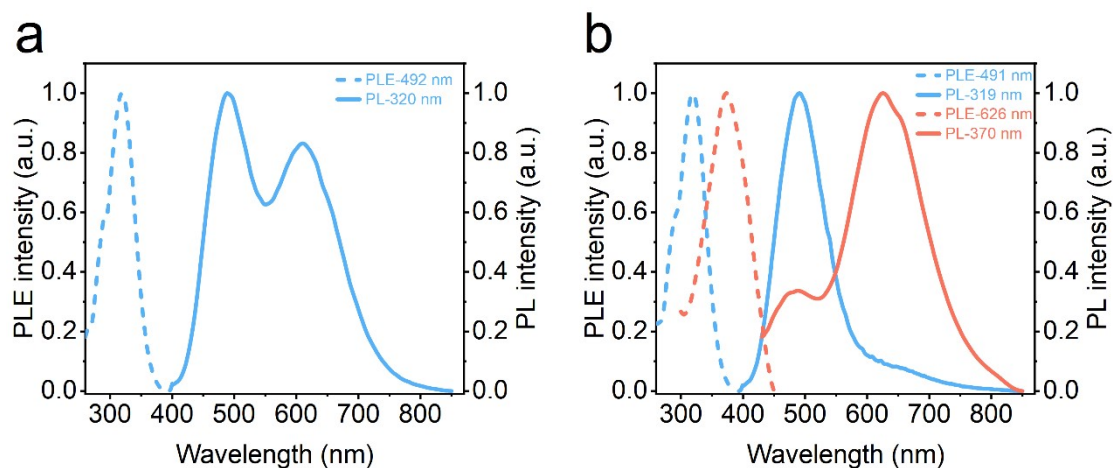

Fig. S12 PL and PLE spectra for (a) *R*-Sb and (b) *rac*-Sb.

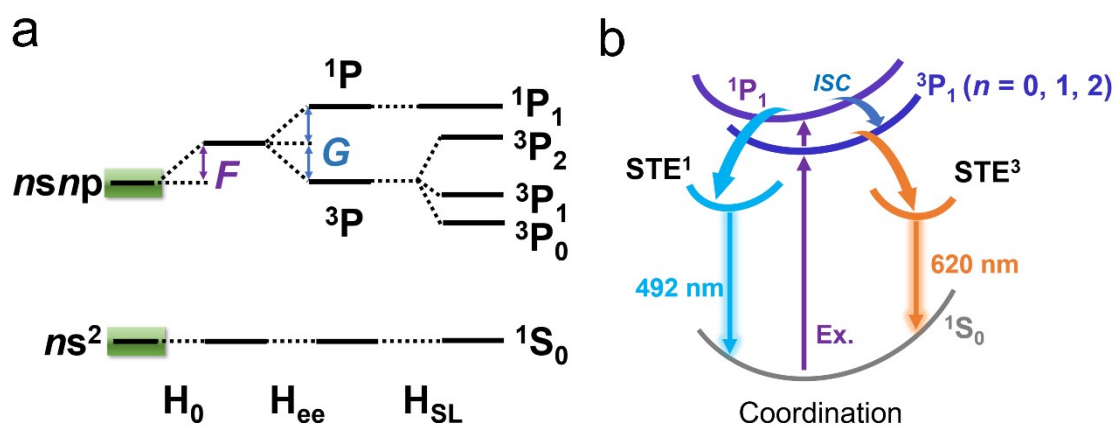

Fig. S13 (a) Energy level diagram for the  $ns^2$  ground-state configuration.  $F$  and  $G$  represent Coulomb and exchange interactions, respectively. (b) Schematic diagram of the energy level structure of photoluminescence in *R*-Sb.

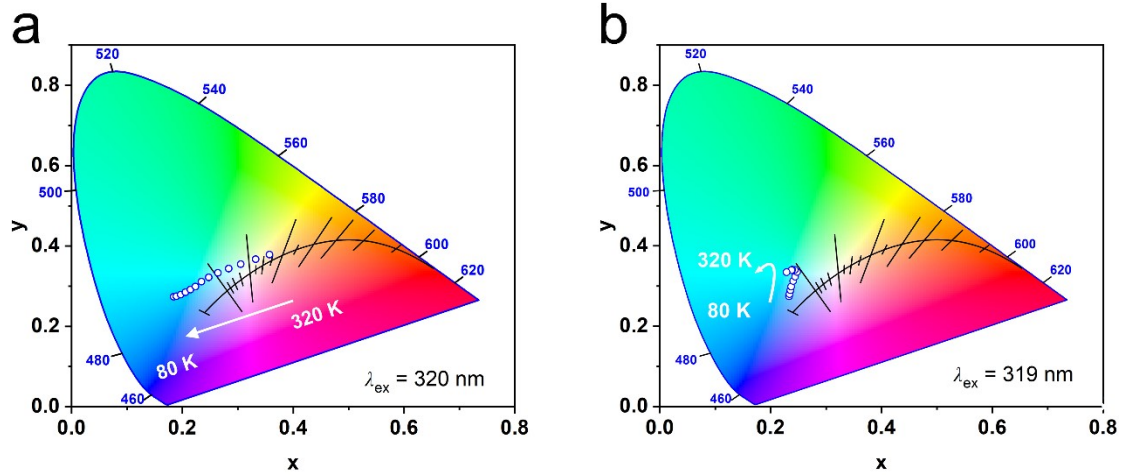

Fig. S14 The Commission Internationale de l'Eclairage (CIE) chromaticity coordinates at different temperature for (a) *R-Sb* and (b) *rac-Sb*.

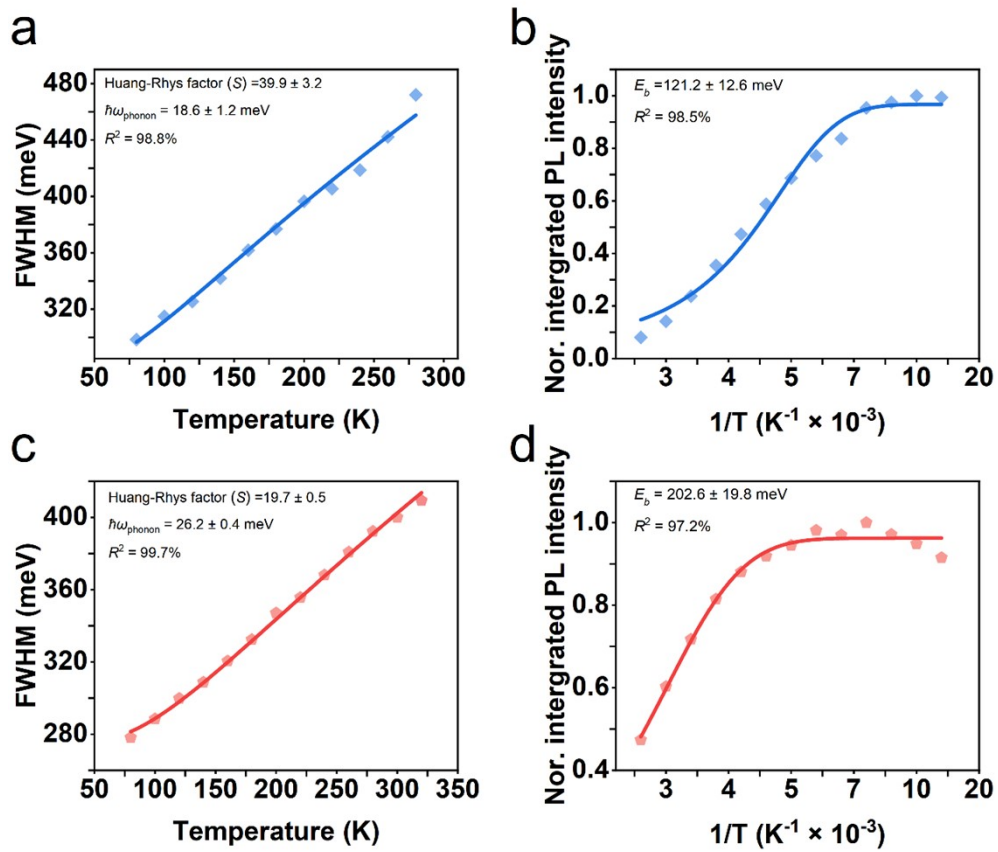

Fig. S15 (a) FWHM and (b) integrated PL intensity of 492 nm as a function of temperature for *R-Sb*; (c) FWHM and (d) integrated PL intensity of 612 nm as a function of temperature for *R-Sb*.



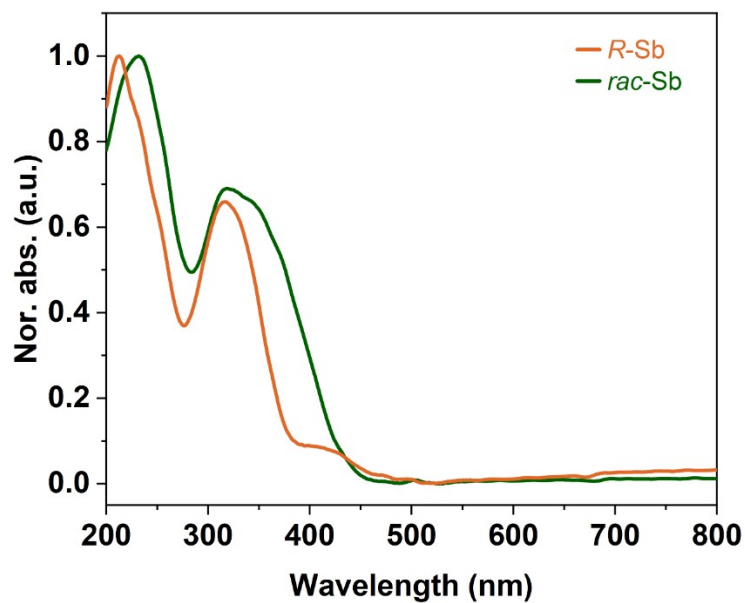

Fig. S16 Normalized UV-vis absorption spectra of *R-Sb* and *rac-Sb*.

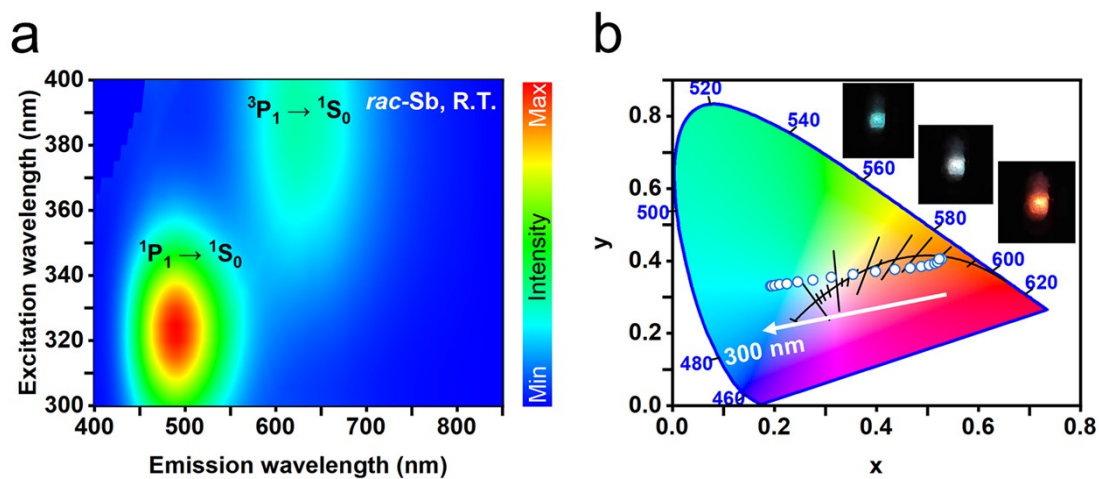

Fig. S17 (a) Excitation-emission mapping patterns of *rac-Sb* at ambient. (b) The corresponding CIE chromaticity coordinates at different excitation wavelengths. Inset: luminescent photographs at excitation of 320 nm (left), 335 nm (medium), and 370 nm (right).

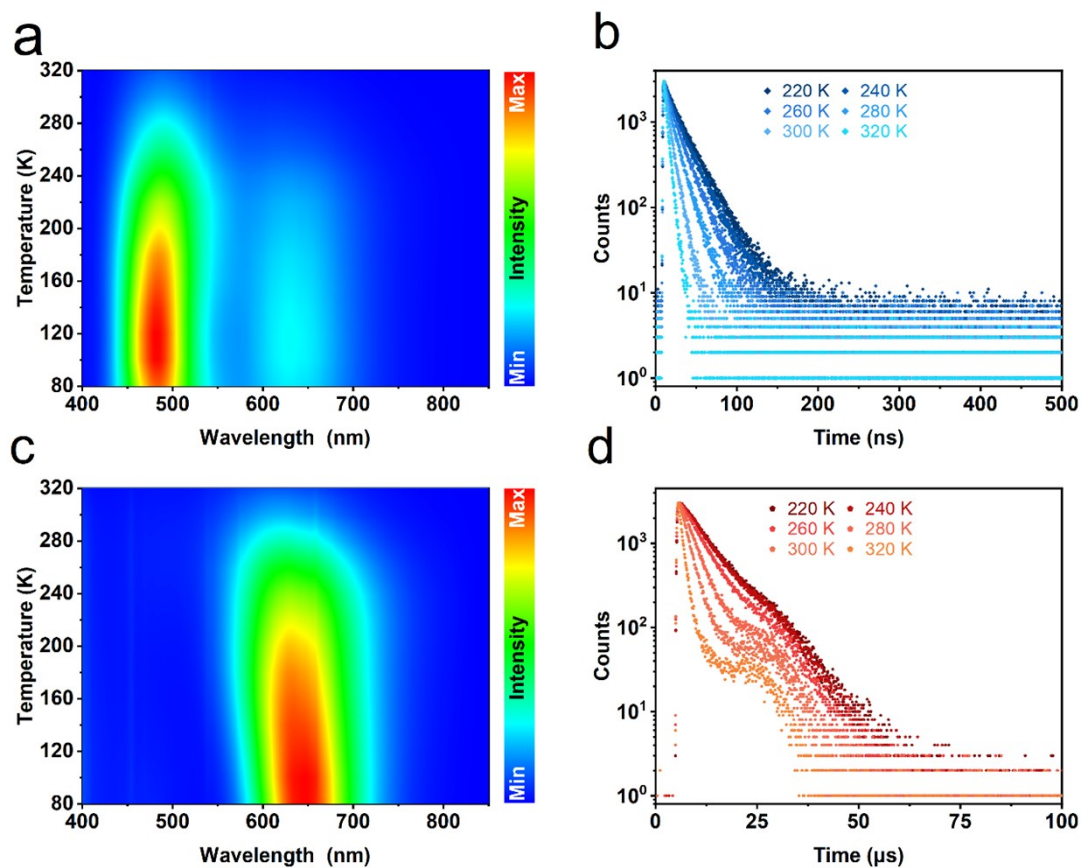

Fig. S18 (a) Temperature-dependent PL spectra ( $\lambda_{\text{ex}} = 319$  nm) and (b) decay PL spectra ( $\lambda_{\text{ex}} = 300$  nm) for *rac*-Sb; (c) temperature-dependent PL spectra ( $\lambda_{\text{ex}} = 371$  nm) and (b) decay PL spectra ( $\lambda_{\text{ex}} = 371$  nm) for *rac*-Sb.

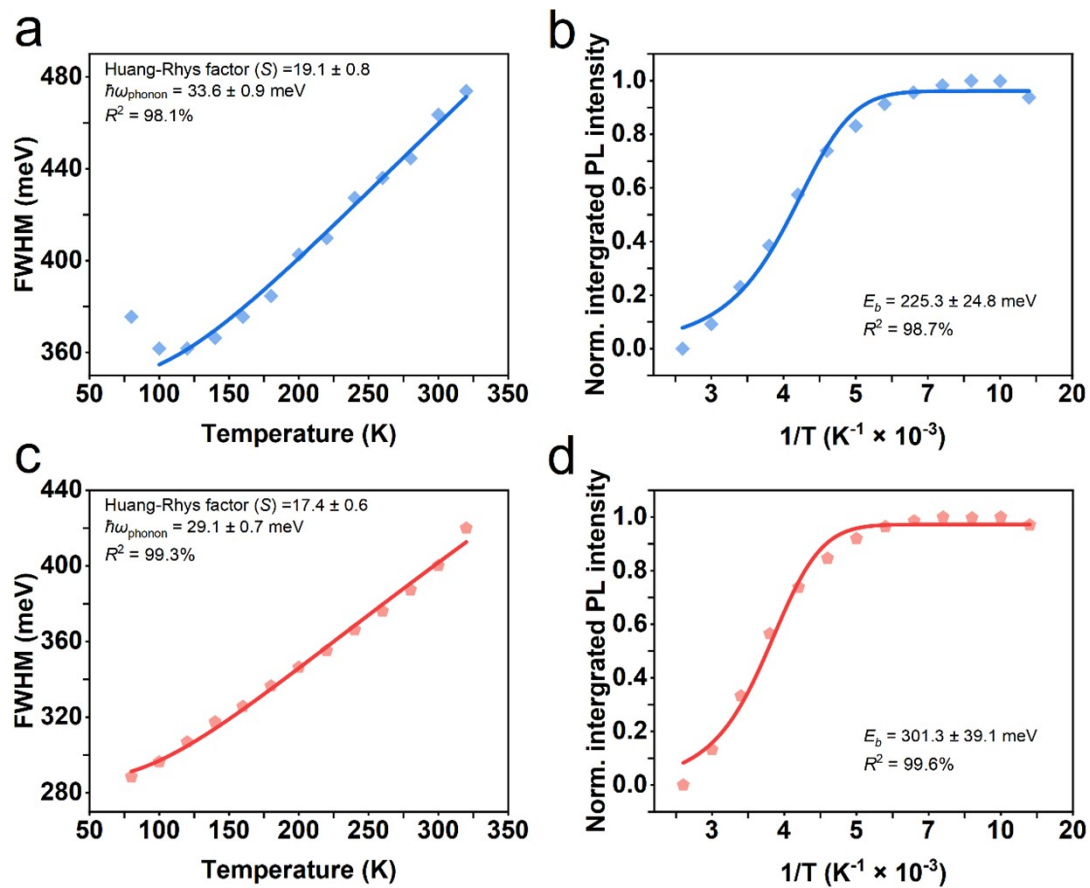

Fig. S19 (a) FWHM and (b) integrated PL intensity of 491 nm as a function of temperature for *rac*-Sb; (c) FWHM and (d) integrated PL intensity of 626 nm as a function of temperature for *rac*-Sb.

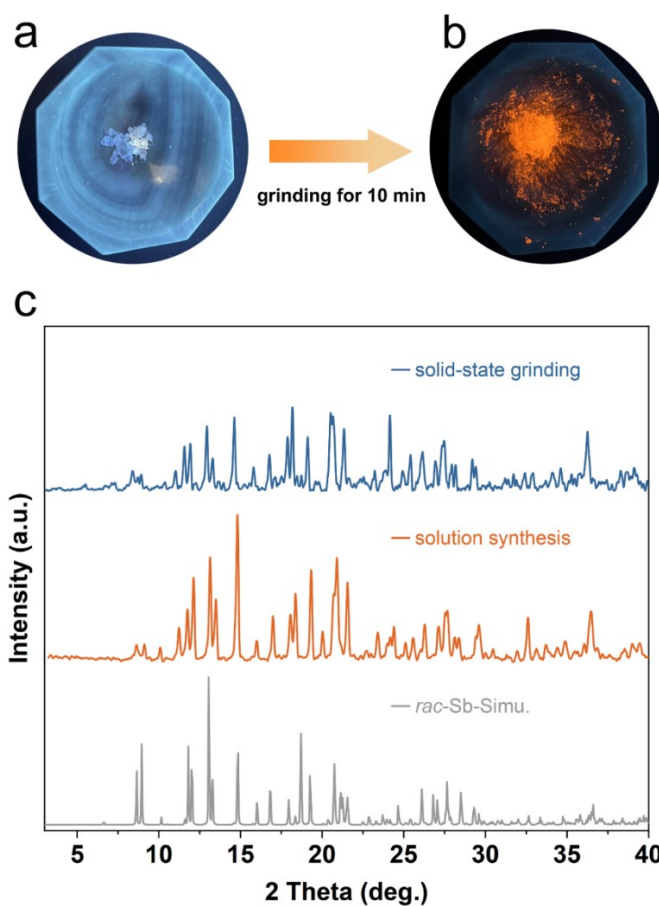

Fig. S20 Solid-state synthesis of *rac*-Sb. Images of the sample before (a) and after (b) mechanical grinding under 365 nm UV lamp. (c) XRD patterns of *rac*-Sb prepared by solid-state grind and solution synthesis.

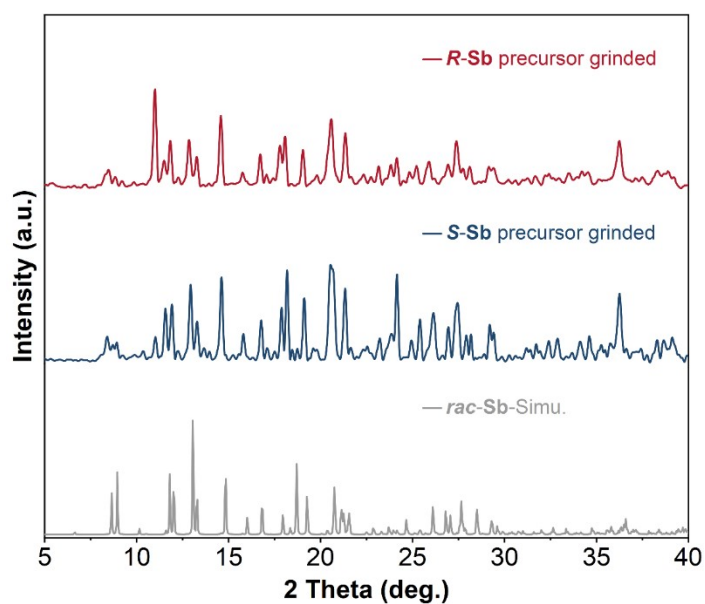

Fig. S21 XRD patterns of the samples prepared by solid-state grinding the *R*-Sb and *S*-Sb precursor materials.

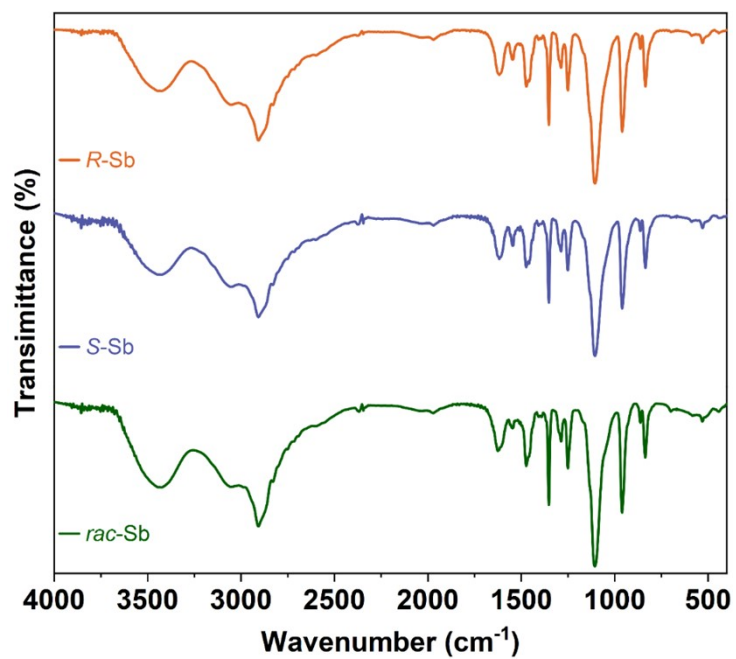

Fig. S22 FT-IR spectra of *R-Sb*, *S-Sb* and *rac-Sb*.

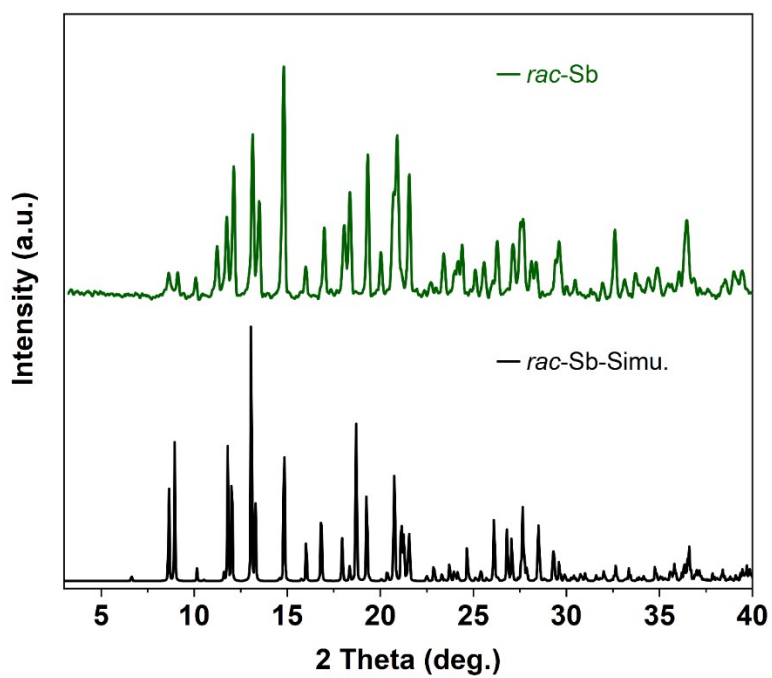

Fig. S23 PXRD patterns of *rac-Sb*, including experimental powder diffraction data (red line) and simulated data (black line).



## Supplementary Tables

**Table. S1** Crystallographic data and refinement details for ***R*-Sb**, ***S*-Sb** and ***rac*-Sb**.

| Identification code                       | <b><i>R</i>-Sb</b>                                                                | <b><i>S</i>-Sb</b>                                                                | <b><i>rac</i>-Sb</b>                                                              |
|-------------------------------------------|-----------------------------------------------------------------------------------|-----------------------------------------------------------------------------------|-----------------------------------------------------------------------------------|
| Empirical formula                         | C <sub>27</sub> H <sub>60</sub> Cl <sub>6</sub> N <sub>2</sub> O <sub>12</sub> Sb | C <sub>27</sub> H <sub>60</sub> Cl <sub>6</sub> N <sub>2</sub> O <sub>12</sub> Sb | C <sub>27</sub> H <sub>60</sub> Cl <sub>6</sub> N <sub>2</sub> O <sub>12</sub> Sb |
| Formula weight                            | 939.22                                                                            | 939.22                                                                            | 939.22                                                                            |
| Temperature/K                             | 100                                                                               | 100                                                                               | 100                                                                               |
| Crystal system                            | tetragonal                                                                        | tetragonal                                                                        | monoclinic                                                                        |
| Space group                               | <i>P</i> 4 <sub>3</sub> 2 <sub>1</sub> 2                                          | <i>P</i> 4 <sub>1</sub> 2 <sub>1</sub> 2                                          | <i>P</i> 2 <sub>1</sub> /m                                                        |
| <i>a</i> /Å                               | 10.11990(10)                                                                      | 10.11536(4)                                                                       | 10.3335(2)                                                                        |
| <i>b</i> /Å                               | 10.11990(10)                                                                      | 10.11536(4)                                                                       | 14.7221(4)                                                                        |
| <i>c</i> /Å                               | 38.9943(4)                                                                        | 38.9841(2)                                                                        | 13.4584(4)                                                                        |
| $\alpha$ /°                               | 90                                                                                | 90                                                                                | 90                                                                                |
| $\beta$ /°                                | 90                                                                                | 90                                                                                | 97.826(2)                                                                         |
| $\gamma$ /°                               | 90                                                                                | 90                                                                                | 90                                                                                |
| Volume/Å <sup>3</sup>                     | 3993.50(9)                                                                        | 3988.87(4)                                                                        | 2028.37(9)                                                                        |
| Z                                         | 4                                                                                 | 4                                                                                 | 2                                                                                 |
| $\rho_{\text{calc}}$ g/cm <sup>3</sup>    | 1.562                                                                             | 1.564                                                                             | 1.538                                                                             |
| $\mu$ /mm <sup>-1</sup>                   | 9.656                                                                             | 9.667                                                                             | 1.130                                                                             |
| F(000)                                    | 1940.0                                                                            | 1940.0                                                                            | 970.0                                                                             |
| Reflections collected                     | 23730                                                                             | 26882                                                                             | 28768                                                                             |
| Data/restraints/parameters                | 4107/0/224                                                                        | 4115/121/234                                                                      | 5617/126/238                                                                      |
| Goodness-of-fit on F <sup>2</sup>         | 1.075                                                                             | 1.058                                                                             | 1.051                                                                             |
| Final R indexes [ $ I  \geq 2\sigma(I)$ ] | R <sub>1</sub> = 0.0639,<br>wR <sub>2</sub> = 0.1861                              | R <sub>1</sub> = 0.0652,<br>wR <sub>2</sub> = 0.1762                              | R <sub>1</sub> = 0.1023,<br>wR <sub>2</sub> = 0.2833                              |
| Final R indexes [all data]                | R <sub>1</sub> = 0.0652,<br>wR <sub>2</sub> = 0.1875                              | R <sub>1</sub> = 0.0660,<br>wR <sub>2</sub> = 0.1770                              | R <sub>1</sub> = 0.1118,<br>wR <sub>2</sub> = 0.2917                              |
| CCDC                                      | 2303422                                                                           | 2303423                                                                           | 2303424                                                                           |

**Table. S2** Selected bond lengths (Å) for for *R*-Sb, *S*-Sb and *rac*-Sb.

| <i>R</i> -Sb         |           | <i>S</i> -Sb         |           | <i>rac</i> -Sb       |           |
|----------------------|-----------|----------------------|-----------|----------------------|-----------|
| Sb1-Cl1              | 2.600(2)  | Sb1-Cl2 <sup>b</sup> | 2.600(2)  | Sb1-Cl4              | 2.620(2)  |
| Sb1-Cl1 <sup>a</sup> | 2.600(2)  | Sb1-Cl2              | 2.599(2)  | Sb1-Cl2              | 2.595(2)  |
| Sb1-Cl2 <sup>a</sup> | 2.468(4)  | Sb1-Cl1              | 2.470(3)  | Sb1-Cl1              | 2.483(4)  |
| Sb1-Cl2              | 2.468(4)  | Sb1-Cl1 <sup>b</sup> | 2.470(3)  | Sb1-Cl1 <sup>c</sup> | 2.483(4)  |
| Sb1-Cl3 <sup>a</sup> | 2.580(4)  | Sb1-Cl3 <sup>b</sup> | 2.576(4)  | Sb1-Cl3              | 2.420(3)  |
| Sb1-Cl3              | 2.580(4)  | Sb1-Cl3              | 2.576(4)  | Sb1-Cl3 <sup>c</sup> | 2.420(3)  |
| C1-C1 <sup>a</sup>   | 1.523(15) | C15-C14              | 1.53(5)   | N1-C2                | 1.493(13) |
| C1-C2                | 1.51(2)   | N2-C13               | 1.50(4)   | O1-C4 <sup>c</sup>   | 1.415(9)  |
| N1-C1                | 1.485(10) | C13-C14              | 1.515(16) | O1-C4                | 1.415(9)  |
| O6-O13               | 1.426(11) | O1-C1                | 1.416(11) | O2-C5                | 1.393(11) |

a)  $1-Y, 1-X, 3/2-Z$ ; b)  $-1+Y, 1+X, 1-Z$ ; c)  $+X, 1/2-Y, +Z$

**Table. S3** Selected bond angles (°) for *R*-Sb, *S*-Sb and *rac*-Sb.

| <i>R</i> -Sb                           |            | <i>S</i> -Sb                           |            | <i>rac</i> -Sb                         |            |
|----------------------------------------|------------|----------------------------------------|------------|----------------------------------------|------------|
| Cl1-Sb1-Cl1 <sup>a</sup>               | 169.94(11) | Cl2-Sb1-Cl2 <sup>b</sup>               | 169.94(11) | Cl2-Sb1-Cl4                            | 176.45(10) |
| Cl2-Sb1-Cl1                            | 87.27(7)   | Cl1 <sup>b</sup> -Sb1-Cl2              | 87.21(7)   | Cl1 <sup>a</sup> -Sb1-Cl4              | 87.22(7)   |
| Cl2 <sup>a</sup> -Sb1-Cl1              | 85.87(7)   | Cl1 <sup>b</sup> -Sb1-Cl2 <sup>b</sup> | 85.91(7)   | Cl1-Sb1-Cl4                            | 87.22(7)   |
| Cl2-Sb1-Cl1 <sup>a</sup>               | 85.86(7)   | Cl1-Sb1-Cl2 <sup>b</sup>               | 87.22(7)   | Cl1 <sup>a</sup> -Sb1-Cl2              | 90.37(9)   |
| Cl2 <sup>a</sup> -Sb1-Cl1              | 87.27(7)   | Cl-Sb1-Cl2                             | 85.91(7)   | Cl1-Sb1-Cl2                            | 90.37(9)   |
| Cl2-Sb1-Cl2 <sup>a</sup>               | 93.89(12)  | Cl1 <sup>b</sup> -Sb1-Cl3              | 93.74(12)  | Cl1 <sup>a</sup> -Sb1-Cl1              | 94.25(18)  |
| Cl2-Sb1-Cl3 <sup>a</sup>               | 166.29(11) | Cl1 <sup>b</sup> -Sb1-Cl3 <sup>b</sup> | 98.08(10)  | Cl3 <sup>a</sup> -Sb1-Cl4              | 92.62(9)   |
| Cl2-Sb1-Cl3                            | 97.93(11)  | Cl1-Sb1-Cl3                            | 98.08(10)  | Cl3-Sb1-Cl4                            | 92.62(9)   |
| Cl2 <sup>a</sup> -Sb1-Cl3 <sup>a</sup> | 97.93(11)  | Cl1 <sup>b</sup> -Sb1-Cl3              | 166.25(10) | Cl3 <sup>a</sup> -Sb1-Cl2              | 90.08(11)  |
| Cl2 <sup>a</sup> -Sb1-Cl3              | 166.29(11) | Cl1-Sb1-Cl3 <sup>b</sup>               | 166.25(10) | Cl3-Sb1-Cl2                            | 90.08(11)  |
| Cl3 <sup>a</sup> -Sb1-Cl1 <sup>a</sup> | 87.79(11)  | Cl3 <sup>b</sup> -Sb1-Cl2 <sup>b</sup> | 100.57(10) | Cl3 <sup>a</sup> -Sb1-Cl1 <sup>a</sup> | 173.46(13) |
| Cl3 <sup>a</sup> -Sb1-Cl1              | 100.43(10) | Cl3-Sb1-Cl2                            | 100.57(10) | Cl3-Sb1-Cl1 <sup>a</sup>               | 92.25(15)  |
| Cl3 <sup>a</sup> -Sb1-Cl1              | 100.43(10) | Cl3-Sb1-Cl2 <sup>b</sup>               | 87.67(10)  | Cl3-Sb1-Cl1                            | 173.46(13) |
| Cl3-Sb1-Cl1                            | 87.79(11)  | Cl3 <sup>b</sup> -Sb1-Cl2              | 87.66(10)  | Cl3 <sup>a</sup> -Sb1-Cl1              | 92.25(15)  |
| Cl3-Sb1-Cl3                            | 71.23(19)  | Cl3 <sup>b</sup> -Sb1-Cl3              | 71.18(18)  | Cl3-Sb1-Cl3 <sup>a</sup>               | 81.2(2)    |
| C13-O6-C12                             | 111.7(7)   | N2-C13-C14                             | 110(2)     | C1-C2-N1                               | 115.1(10)  |
| C14-O1-C3                              | 111.7(7)   | N1-C13-C13 <sup>b</sup>                | 111.2(8)   | C3-C2-N1                               | 114.2(11)  |
| C10-O5-C11                             | 111.3(7)   | C13-C14-C15                            | 120(2)     | C3-C2-C1                               | 130.7(12)  |
| C8-O4-C9                               | 111.4(7)   | N1-C14-C15                             | 103(3)     | C14-O6-C13                             | 109.4(6)   |
| C6-O3-C7                               | 104.4(10)  | N1-C14-C13                             | 111(2)     | C15 <sup>a</sup> -O5-C15               | 108.3(13)  |
| C4-O2-C5                               | 107.4(8)   | C6-O4-C7                               | 105.2(10)  | O2-C6-C7                               | 126.7(18)  |
| N1-C1-C1 <sup>a</sup>                  | 110.8(8)   | C8-O5-C9                               | 111.6(7)   | O3-C7-C6                               | 110.9(8)   |
| N1-C1-C2                               | 105.9(9)   | C10-O6-C11                             | 111.5(7)   | O4-C9-C8                               | 107.7(10)  |

a) 1-Y,1-X,3/2-Z; b) -1+Y,1+X,1-Z; c) +X,1/2-Y,+Z

**Table. S4** Crystallographic data and refinement details for **S-PPD-Sb**.

| Identification code                           | <b>S-PPD-Sb</b>                                                  |
|-----------------------------------------------|------------------------------------------------------------------|
| Empirical formula                             | C <sub>6</sub> H <sub>24</sub> Cl <sub>7</sub> N <sub>4</sub> Sb |
| Formula weight                                | 522.19                                                           |
| Temperature/K                                 | 100.00(10)                                                       |
| Crystal system                                | orthorhombic                                                     |
| Space group                                   | <i>P</i> 2 <sub>1</sub> 2 <sub>1</sub> 2 <sub>1</sub>            |
| <i>a</i> /Å                                   | 9.16220(10)                                                      |
| <i>b</i> /Å                                   | 10.5718(2)                                                       |
| <i>c</i> /Å                                   | 19.3536(4)                                                       |
| <i>α</i> /°                                   | 90                                                               |
| <i>β</i> /°                                   | 90                                                               |
| <i>γ</i> /°                                   | 90                                                               |
| Volume/Å <sup>3</sup>                         | 1874.61(6)                                                       |
| <i>Z</i>                                      | 4                                                                |
| $\rho_{\text{calc}}$ g/cm <sup>3</sup>        | 1.850                                                            |
| $\mu$ /mm <sup>-1</sup>                       | 2.460                                                            |
| F(000)                                        | 1032.0                                                           |
| Reflections collected                         | 18707                                                            |
| Data/restraints/parameters                    | 4998/0/169                                                       |
| Goodness-of-fit on <i>F</i> <sup>2</sup>      | 1.046                                                            |
| Final R indexes [ <i>I</i> ≥ 2σ ( <i>I</i> )] | R <sub>1</sub> = 0.0135, wR <sub>2</sub> = 0.0288                |
| Final R indexes [all data]                    | R <sub>1</sub> = 0.0139, wR <sub>2</sub> = 0.0289                |
| CCDC                                          | 2303425                                                          |

**Table. S5** Selected bond lengths (Å) for for **S-PPD-Sb**.

---

| <b>S-PPD-Sb</b> |           |
|-----------------|-----------|
| Sb1-Cl5         | 2.4149(5) |
| Sb1-Cl6         | 2.6827(5) |
| Sb1-Cl7         | 2.4355(5) |
| Sb1-Cl4         | 2.5226(5) |
| N3-C4           | 1.491(3)  |
| N1-C2           | 1.502(2)  |
| N2-C3           | 1.492(3)  |
| N4-C6           | 1.510(3)  |
| C3-C2           | 1.527(3)  |
| C2-C1           | 1.520(3)  |

---

**Table. S6** Selected bond angles (°) for **S-PPD-Sb**.

---

| <b>S-PPD-Sb</b> |             |
|-----------------|-------------|
| Cl5-Sb1-Cl6     | 88.798(17)  |
| Cl5-Sb1-Cl7     | 87.232(15)  |
| Cl5-Sb1-Cl4     | 91.794(18)  |
| Cl7-Sb1-Cl6     | 85.767(16)  |
| Cl7-Sb1-Cl4     | 88.458(17)  |
| Cl4-Sb1-Cl6     | 174.160(17) |
| N2-C3-C2        | 109.77(16)  |
| N1-C2-C3        | 107.44(16)  |
| N1-C2-C1        | 109.83(16)  |
| C1-C2-C3        | 113.94(16)  |
| N4-C6-C7        | 108.92(16)  |
| N4-C6-C4        | 110.62(16)  |
| C7-C6-C4        | 109.66(17)  |
| N3-C4-C6        | 113.75(18)  |

---



**Table. S7** Luminescence dissymmetry factors of various chiral antimony halides

| Chiral HOMHs                                                                       | Dimensionality | $g_{\text{lum}}$      | PLQY <sup>a)</sup> | Reference |
|------------------------------------------------------------------------------------|----------------|-----------------------|--------------------|-----------|
| ( <i>R, R/S</i> , S-DCDA) <sub>3</sub> Sb <sub>2</sub> Cl <sub>12</sub>            | 0D             | $3.22 \times 10^{-3}$ | 27.6%              | [1]       |
| <i>R/S</i> -(C <sub>5</sub> H <sub>12</sub> NO) <sub>2</sub> SbCl <sub>5</sub>     | 0D             | $1.2 \times 10^{-3}$  | 2.16%              | [2]       |
| ( <i>R/S</i> )-C <sub>6</sub> H <sub>15</sub> Cl <sub>2</sub> NO·SbCl <sub>5</sub> | 0D             | $2.5 \times 10^{-4}$  | 71.2%              | [3]       |
| <b><i>R/S</i>-Sb</b>                                                               | 0D             | $5.7 \times 10^{-3}$  | 87.16%             | This work |

<sup>a)</sup>The PLQY is the highest quantum yield among the various excitation wavelengths

## Supplementary References

- [1] C.-Y. Chai, X.-B. Han, C.-D. Liu, C.-C. Fan, B.-D. Liang, W. Zhang, *J. Phys. Chem. Lett.* **2023**, 14, 4063.
- [2] D.-Y. Liu, H.-Y. Li, R.-P. Han, H.-L. Liu, S.-Q. Zang, *Angew. Chem. Int. Ed.* **2023**, 62, e202307875.
- [3] H.-L. Xuan, J.-L. Li, L.-J. Xu, D.-S. Zheng, Z.-N. Chen, *Adv. Opt. Mater.* **2022**, 10, 2200591.
